# Supplementary material for: Advances in the clinical application of ultrasound elastography in uterine imaging
Source: Springer Nature journal article supplement (doi:10.1186/s13244-022-01274-9), 2022-09-04
Supplement: 13244_2022_1274_MOESM1_ESM.pdf [file 13244_2022_1274_MOESM1_ESM.pdf]

## **ELECTRONIC SUPPLEMENTARY MATERIAL**

### **Advances in the clinical application of ultrasound elastography in uterine imaging**

#### **References for table 1**

1. Manchanda S, Vora Z, Sharma R et al. (2019) Quantitative Sonoelastographic Assessment of the Normal Uterus Using Shear Wave Elastography: An Initial Experience *Journal of ultrasound in medicine : official journal of the American Institute of Ultrasound in Medicine* 38:3183-3189
  2. Soliman AA, Wojcinski S, Degenhardt F (2015) Ultrasonographic examination of the endometrium and myometrium using acoustic radiation force impulse (ARFI) imaging technology: An initial experience with a new method *Clinical hemorheology and microcirculation* 59:235-243
  3. Pongpunprut S, Panburana P, Wibulpolprasert P et al. (2022) A Comparison of Shear Wave Elastography between Normal Myometrium, Uterine Fibroids, and Adenomyosis: A Cross-Sectional Study *International journal of fertility & sterility* 16:49-54
  4. Görgülü FF, Okçu NT (2021) Which imaging method is better for the differentiation of adenomyosis and uterine fibroids? *Journal of gynecology obstetrics and human reproduction* 50:102002
  5. Zhang Y, Yan Y, Yang Y (2019) Study on value of ultrasonic elastography in diagnosis of clinical staging of cervical cancer and efficacy evaluation of radiotherapy *Oncology letters* 17:4901-4906
  6. Bildaci TB, Cevik H, Yilmaz B, Desteli GA (2018) Value of in vitro acoustic radiation force impulse application on uterine adenomyosis *Journal of medical ultrasonics* (2001) 45:425-430
  7. Stoelinga B, Hehenkamp WJK, Nieuwenhuis LL et al. (2018) Accuracy and Reproducibility of Sonoelastography for the Assessment of Fibroids and Adenomyosis, with Magnetic Resonance Imaging as Reference Standard *Ultrasound in medicine & biology* 44:1654-1663
- Insights Imaging (2022) Wang XL, Lin S, Lyu G

- 8.Liu X, Ding D, Ren Y, Guo SW (2018) Transvaginal Elastosonography as an Imaging Technique for Diagnosing Adenomyosis *Reproductive sciences* (Thousand Oaks, Calif) 25:498-514
- 9.Frank ML, Schäfer SD, Möllers M et al. (2016) Importance of Transvaginal Elastography in the Diagnosis of Uterine Fibroids and Adenomyosis *Ultraschall in der Medizin* (Stuttgart, Germany : 1980) 37:373-378
- 10.Samanci C, Önal Y (2020) Shearwave elastographic evaluation of uterine leiomyomas after uterine artery embolization: preliminary results *Turkish journal of medical sciences* 50:426-432
- 11.Xie M, Yu H, Zhang X, Wang W, Ren Y (2019) Elasticity of adenomyosis is increased after GnRHa therapy and is associated with spontaneous pregnancy in infertile patents *Journal of gynecology obstetrics and human reproduction* 48:849-853

#### **References for table 2**

- 1.Vora Z, Manchanda S, Sharma R et al. (2022) Transvaginal Shear Wave Elastography for Assessment of Endometrial and Subendometrial Pathologies: A Prospective Pilot Study *Journal of ultrasound in medicine : official journal of the American Institute of Ultrasound in Medicine* 41:61-70
- 2.Ma H, Yang Z, Wang Y et al. (2021) The Value of Shear Wave Elastography in Predicting the Risk of Endometrial Cancer and Atypical Endometrial Hyperplasia *Journal of ultrasound in medicine : official journal of the American Institute of Ultrasound in Medicine* 40:2441-2448
- 3.Du YY, Yan XJ, Guo YJ et al. (2021) Transvaginal Real-Time Shear Wave Elastography in the Diagnosis of Endometrial Lesions *International journal of general medicine* 14:2849-2856
- 4.Gultekin IB, Imamoglu GI, Turgal M et al. (2016) Elastosonographic evaluation of patients with a sonographic finding of thickened endometrium *European journal of obstetrics, gynecology, and reproductive biology* 198:105-109
- 5.Czuczwar P, Wozniak S, Szkodziak P et al. (2016) Elastography Improves the Diagnostic Insights *Imaging* (2022) Wang XL, Lin S, Lyu G

Accuracy of Sonography in Differentiating Endometrial Polyps and Submucosal Fibroids  
Journal of ultrasound in medicine : official journal of the American Institute of Ultrasound in  
Medicine 35:2389-2395

6.Kabukçu C, Çabuş Ü, Öztekin Ö, Fenkçi V (2021) The strain rate of endometrium  
measured by real-time sonoelastography as a predictive marker for pregnancy in  
gonadotropin stimulated intrauterine insemination cycles The journal of obstetrics and  
gynaecology research 47:3561-3570

7.Shui X, Yu C, Li J, Jiao Y (2021) Development and validation of a pregnancy prediction  
model based on ultrasonographic features related to endometrial receptivity American  
journal of translational research 13:6156-6165

8.Swierkowski-Blanchard N, Boitrelle F, Alter L et al. (2017) Uterine contractility and  
elastography as prognostic factors for pregnancy after intrauterine insemination Fertility and  
sterility 107:961-968.e963
